# Supplementary material for: Characterization of Volatile Organic Compounds Emitted from Endophytic Burkholderia cenocepacia ETR-B22 by SPME-GC-MS and Their Inhibitory Activity against Various Plant Fungal Pathogens
Source: PubMed Central journal article supplement (PMC7504634; doi:10.3390/molecules25173765), 2020-08-19
Supplement: molecules-25-03765-s001.pdf [file molecules-25-03765-s001.pdf]

## 1 Supplementary Materials

2 **Table S1.** Volatile organic compounds detected and identified by HS-SMPE GC-MS analysis of  
 3 *B. cenocepacia* ETR-B22. Retention Time (RT), Chemical formula and GC peak Relative Area  
 4 (RA), Similarity (S) and Chemical Abstracts Service (CAS) identifier were listed in this table.

| Chemical class               | Compound                         | Chemical formula                               | RT (min)                                      | RA (%)    | S (%)     | CAS#       |          |
|------------------------------|----------------------------------|------------------------------------------------|-----------------------------------------------|-----------|-----------|------------|----------|
| hydrocarbons                 | 1,3,5,7-Cyclooctatetraene        | C <sub>8</sub> H <sub>8</sub>                  | 6.14                                          | 0.25±0.02 | 93.2      | 629-20-9   |          |
|                              | Decane, 3,7-dimethyl-            | C <sub>8</sub> H <sub>18</sub>                 | 13.33                                         | 0.12±0.01 | 89.0      | 17312-54-8 |          |
|                              | Naphthalene                      | C <sub>10</sub> H <sub>8</sub>                 | 15.74                                         | 0.20±0.01 | 92.7      | 91-20-3    |          |
|                              | Undecane, 2,10-dimethyl-         | C <sub>13</sub> H <sub>28</sub>                | 22.58                                         | 0.21±0.02 | 87.4      | 17301-27-8 |          |
|                              | Cyclopentane, decyl-             | C <sub>15</sub> H <sub>30</sub>                | 25.07                                         | 0.24±0.02 | 93.5      | 541-02-6   |          |
|                              | 3-Hexadecene, (Z)-               | C <sub>16</sub> H <sub>32</sub>                | 26.46                                         | 0.52±0.07 | 96.4      | 34303-81-6 |          |
|                              | Eicosane                         | C <sub>20</sub> H <sub>42</sub>                | 27.73                                         | 0.13±0.01 | 92.8      | 112-95-8   |          |
|                              | 2,6,10,15-Tetramethylheptadecane | C <sub>21</sub> H <sub>44</sub>                | 28.75                                         | 0.11±0.02 | 88.0      | 54833-48-6 |          |
|                              | Pentadecane, 3-methyl-           | C <sub>16</sub> H <sub>34</sub>                | 28.98                                         | 0.18±0.01 | 92.0      | 2882-96-4  |          |
|                              | Heptadecane                      | C <sub>17</sub> H <sub>36</sub>                | 32.74                                         | 0.75±0.11 | 92.9      | 629-78-7   |          |
|                              | Heneicosane                      | C <sub>21</sub> H <sub>44</sub>                | 43.4                                          | 0.11±0.01 | 86.0      | 629-94-7   |          |
|                              | Esters                           | Methyl benzoate                                | C <sub>8</sub> H <sub>8</sub> O <sub>2</sub>  | 12.92     | 0.37±0.08 | 96.2       | 93-58-3  |
|                              |                                  | Benzyl acetate                                 | C <sub>9</sub> H <sub>10</sub> O <sub>2</sub> | 15.33     | 2.14±0.21 | 97.0       | 140-11-4 |
| Methyl salicylate            |                                  | C <sub>8</sub> H <sub>8</sub> O <sub>3</sub>   | 16.29                                         | 0.56±0.08 | 90.5      | 119-36-8   |          |
| Benzyl propionate            |                                  | C <sub>10</sub> H <sub>12</sub> O <sub>2</sub> | 18.67                                         | 0.53±0.06 | 95.6      | 122-63-4   |          |
| Methyl anthranilate          |                                  | C <sub>8</sub> H <sub>9</sub> NO <sub>2</sub>  | 21.49                                         | 5.17±0.19 | 97.3      | 134-20-3   |          |
| 3-Hexen-1-ol, benzoate, (Z)- |                                  | C <sub>13</sub> H <sub>16</sub> O <sub>2</sub> | 28.90                                         | 0.28±0.05 | 94.9      | 25152-85-6 |          |
| Benzyl benzoate              |                                  | C <sub>14</sub> H <sub>12</sub> O <sub>2</sub> | 34.32                                         | 0.79±0.25 | 97.2      | 120-51-4   |          |
| Ethers                       | Dimethyl trisulfide              | C <sub>2</sub> H <sub>6</sub> S <sub>3</sub>   | 8.91                                          | 1.34±0.15 | 88.5      | 3658-80-8  |          |
|                              | Allyl benzyl ether               | C <sub>10</sub> H <sub>12</sub> O              | 11.04                                         | 0.62±0.08 | 88.9      | 14593-43-2 |          |

|                       |                                 |                                                |       |           |      |            |
|-----------------------|---------------------------------|------------------------------------------------|-------|-----------|------|------------|
| Ketones               | 2-Pentadecanone                 | C <sub>15</sub> H <sub>30</sub> O              | 32.43 | 0.18±0.04 | 88.1 | 2345-28-0  |
|                       | 2(3H)-Furanone,5-dodecyldihydro | C <sub>18</sub> H <sub>34</sub> O <sub>2</sub> | 41.50 | 0.41±0.05 | 89.0 | 502-26-1   |
| Alcohols              | 2-Isopropyl-5-methyl-1-heptanol | C <sub>11</sub> H <sub>24</sub> O              | 20.78 | 0.19±0.03 | 87.5 | 91337-07-4 |
|                       | trans-Geranylgeraniol           | C <sub>20</sub> H <sub>34</sub> O              | 37.73 | 0.09±0.01 | 86.3 | 24034-73-9 |
| Organic acids         | Nonanoic acid                   | C <sub>9</sub> H <sub>18</sub> O <sub>2</sub>  | 19.04 | 0.29±0.05 | 91.2 | 112-05-0   |
|                       | cis-Vaccenic acid               | C <sub>18</sub> H <sub>34</sub> O <sub>2</sub> | 42.21 | 0.25±0.01 | 93.4 | 506-17-2   |
|                       | Octadecanoic acid               | C <sub>18</sub> H <sub>36</sub> O <sub>2</sub> | 42.67 | 0.39±0.06 | 93.7 | 57-11-4    |
| Nitrogenous compounds | Oxime-, methoxy-phenyl-         | C <sub>8</sub> H <sub>9</sub> NO <sub>2</sub>  | 7.14  | 3.28±0.27 | 86.2 | NA         |
|                       | Indole                          | C <sub>8</sub> H <sub>7</sub> N                | 19.89 | 1.54±0.05 | 95.6 | 120-72-9   |
|                       | Dodecanamide                    | C <sub>12</sub> H <sub>25</sub> NO             | 34.18 | 0.20±0.02 | 84.8 | 1120-16-7  |
| Phenols               | 3,5-Di-tert-butylphenol         | C <sub>14</sub> H <sub>22</sub> O              | 26.89 | 0.62±0.05 | 92.5 | 1138-52-9  |
| Aldehydes             | Decanal                         | C <sub>10</sub> H <sub>20</sub> O              | 16.90 | 0.11±0.02 | 92.6 | 112-31-2   |

5 **Note:** The number of similarity of VOCs more than 80 are listed in this table. NA indicates that  
6 the compound was not matched to the database. Data are presented as means ± standard error.
